# Supplementary material
Source: Royal Society of Chemistry journal article supplement (doi:10.1039/d6nr01282e)
Supplement: d6nr01282e1.pdf [file d6nr01282e1.pdf]

## Supplementary Information

### Selective *N*-Demethylation of Aryl Tertiary Amines via a Photoinduced COF Catalytic Strategy.

Jun Wan, †<sup>a</sup> Yu Zhang, †\*<sup>a</sup> Chunyuan Hou,<sup>a</sup> Ziyao Zhao,<sup>a</sup> Peicheng Wang<sup>a</sup> and Jun Luo\*<sup>a</sup>

<sup>a</sup> *School of Chemistry and Chemical Engineering, Nanjing University of Science and Technology, Nanjing, 210094, China. E-mail: y\_zhang@njust.edu.cn (Y. Zhang), loojun@njust.edu.cn (J. Luo)*

† *These authors contributed equally to this work.*

\* *Corresponding author.*

**This Word includes:**

Fig. S1 EDX images of Py-BSZ-COF(C=N), Py-BSZ-COF(C=C), Py-TB-COF(C=C). .....3

Fig. S2 The XPS valence band spectra of three COFs. ....4

Fig. S3 PXRD patterns (left) and FTIR spectra (right) of the treated Py-BSZ-COF(C=C) under different conditions (6 M HCl, 3 M NaOH, EtOH and EtOH + 30 W Blue light irradiation). ...5

Fig. S4 TGA of Py-BSZ-COF(C=C). .....6

Fig. S5 Comparison of XRD patterns of Py-BSZ-COF (C=C) before and after reaction. ....7

Fig. S6 Comparison of FT-IR patterns of Py-BSZ-COF (C=C) before and after reaction. ....8

Fig. S7 Comparison of SEM patterns of Py-BSZ-COF (C=C) before (a) and after reaction (b).  
.....9

Fig. S8 EPR spectra of 2,2,6,6-tetramethylpiperidine (TEMP) treated by Py-BSZ-COF(C=C) under blue light (427m). .....10

Fig. S9 Light on-off cycling experiment for the *N*-demethylation mediated by Py-BSZ-COF(C=C). .....11

Fig. S10 Cyclic voltammetry (CV) measurements of *N,N*-dimethyl-*p*-bromoaniline.....12

Fig. S11 Expansion of light reaction substrates (*N*-demethylation, *N*-formylation). .....13

Table S1. Optimization of reaction conditons. ....14

<sup>1</sup>H NMR and <sup>13</sup>C NMR spectra for products. ....16

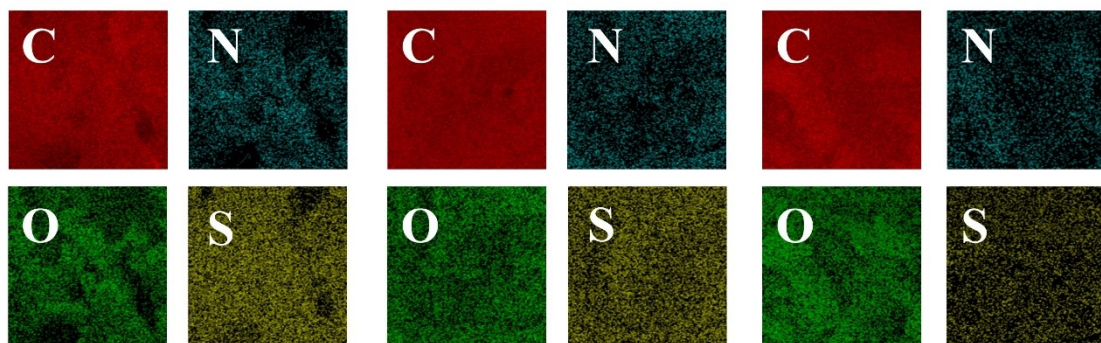

**Fig. S1** EDX images of Py-BSZ-COF(C=N), Py-BSZ-COF(C=C), Py-TB-COF(C=C).

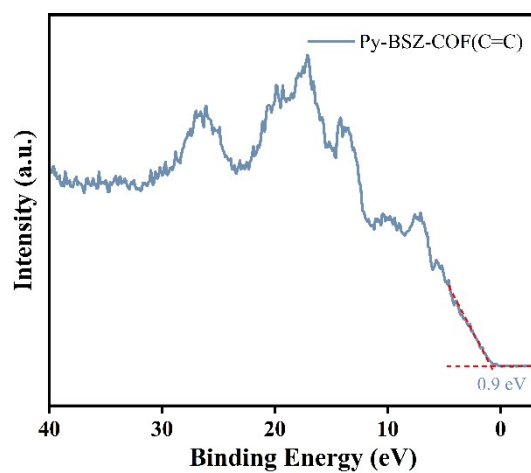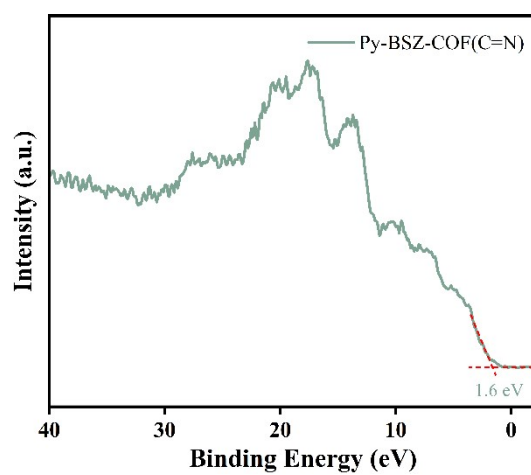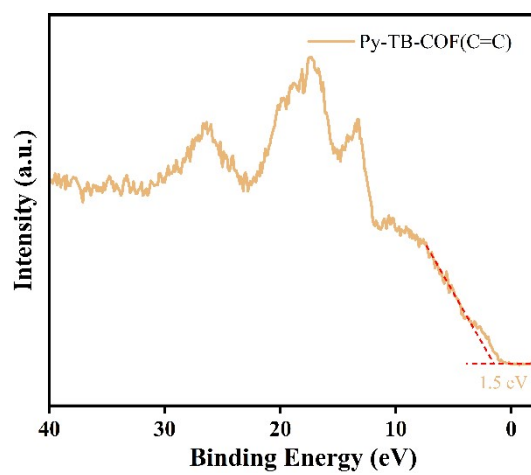

Fig. S2 The XPS valence band spectra of three COFs.

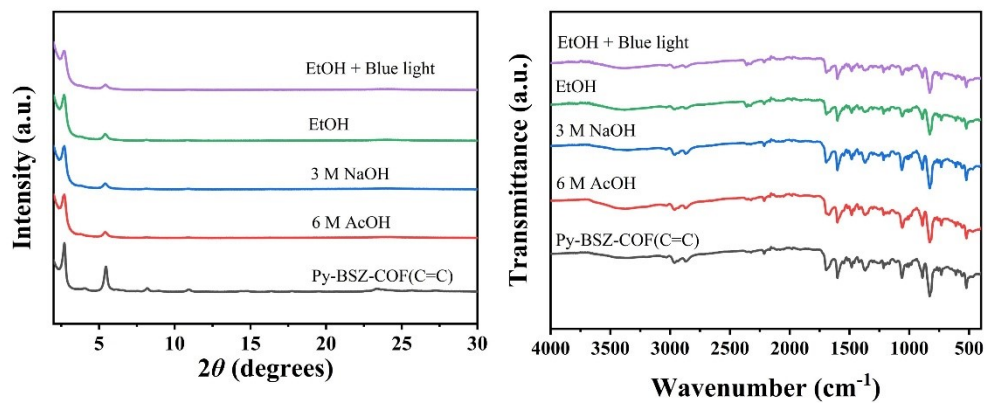

**Fig. S3** PXR patterns (left) and FTIR spectra (right) of the treated Py-BSZ-COF(C=C) under different conditions (6 M HCl, 3 M NaOH, EtOH and EtOH + 30 W Blue light irradiation).

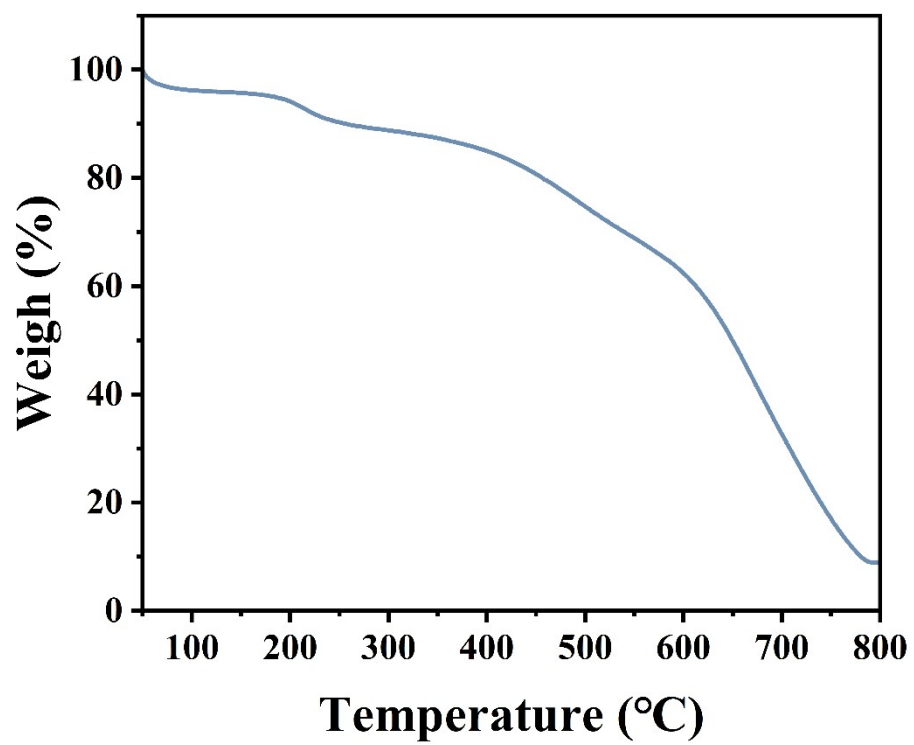

**Fig. S4** TGA of Py-BSZ-COF(C=C).

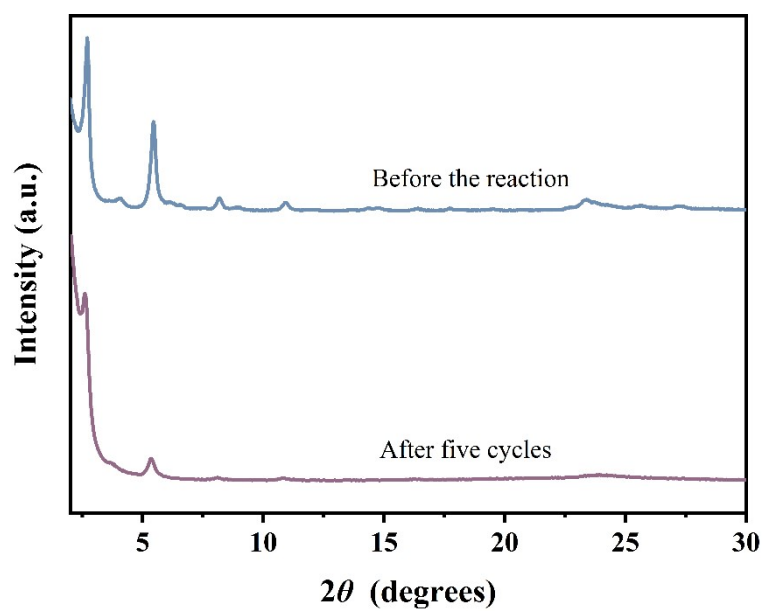

**Fig. S5** Comparison of XRD patterns of Py-BSZ-COF (C=C) before and after reaction.

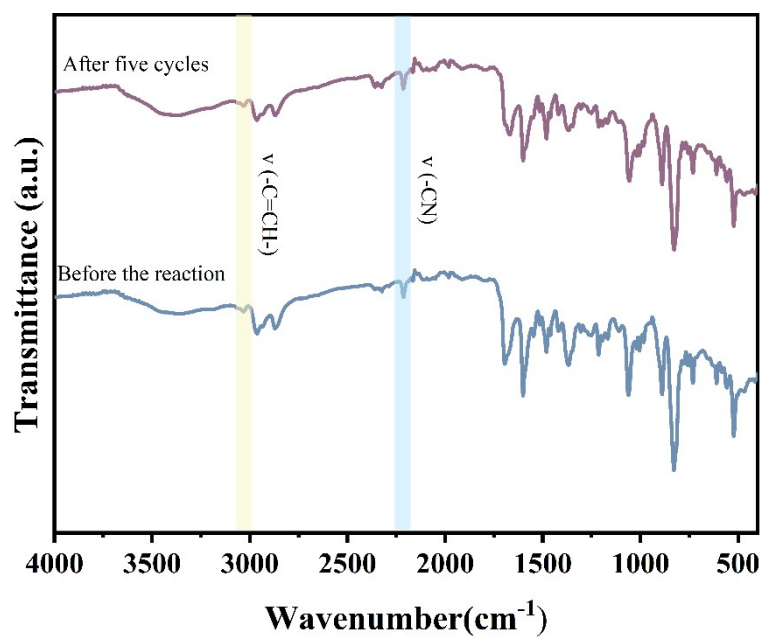

Fig. S6 Comparison of FT-IR patterns of Py-BSZ-COF (C=C) before and after reaction.

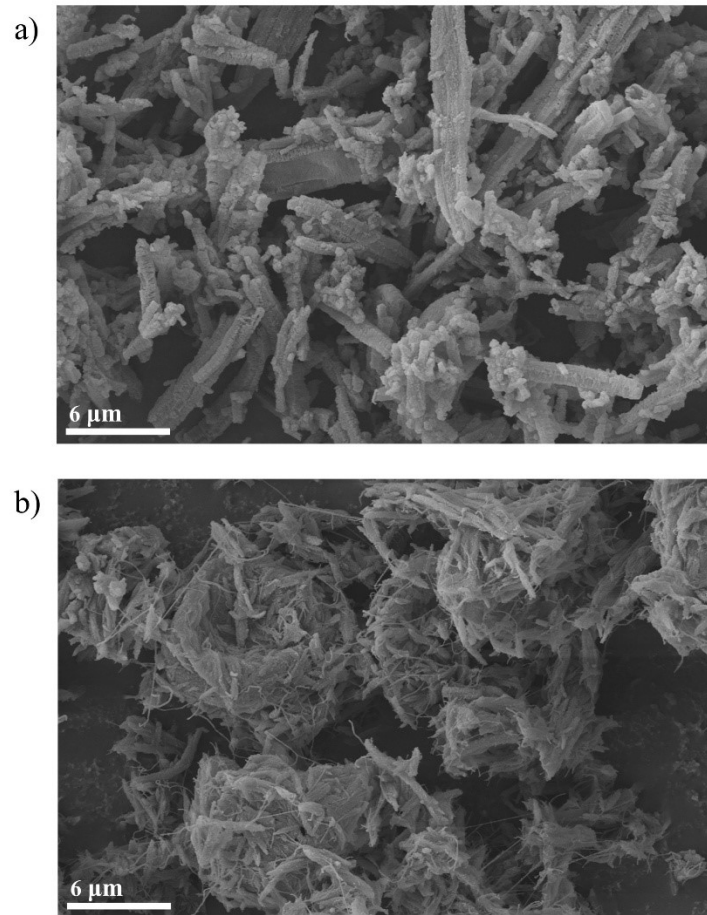

**Fig. S7** Comparison of SEM patterns of Py-BSZ-COF (C=C) before (a) and after reaction (b).

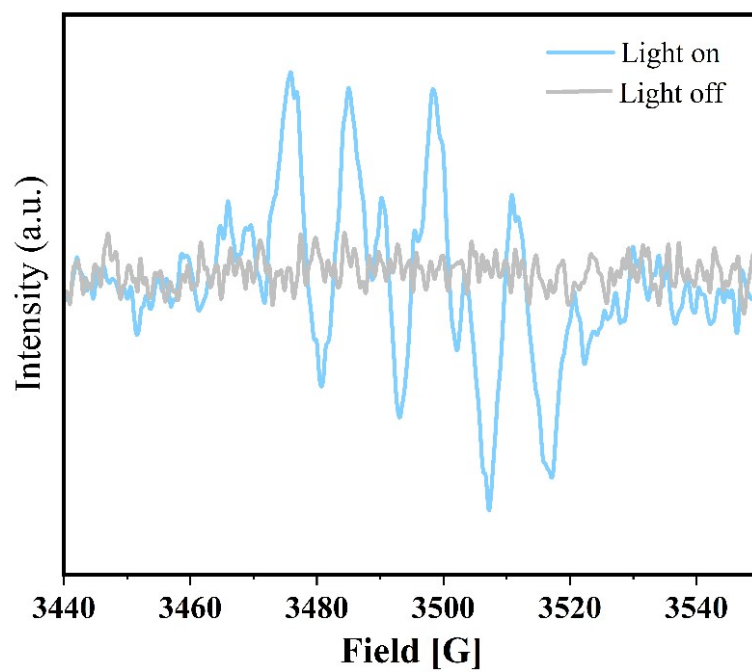

**Fig. S8** EPR spectra of 2,2,6,6-tetramethylpiperidine (TEMP) treated by Py-BSZ-COF(C=C) under blue light (427m).

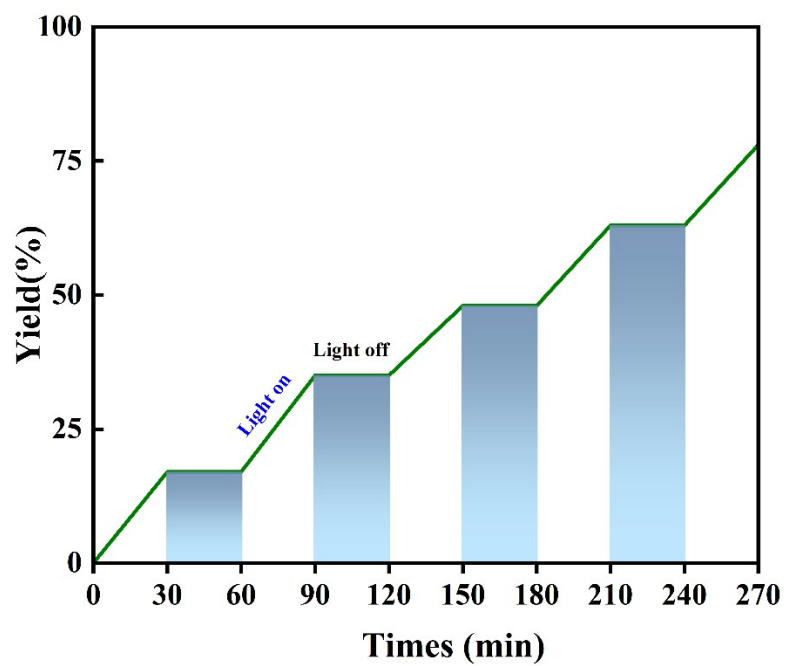

**Fig. S9** Light on-off cycling experiment for the *N*-demethylation mediated by Py-BSZ-COF(C=C).

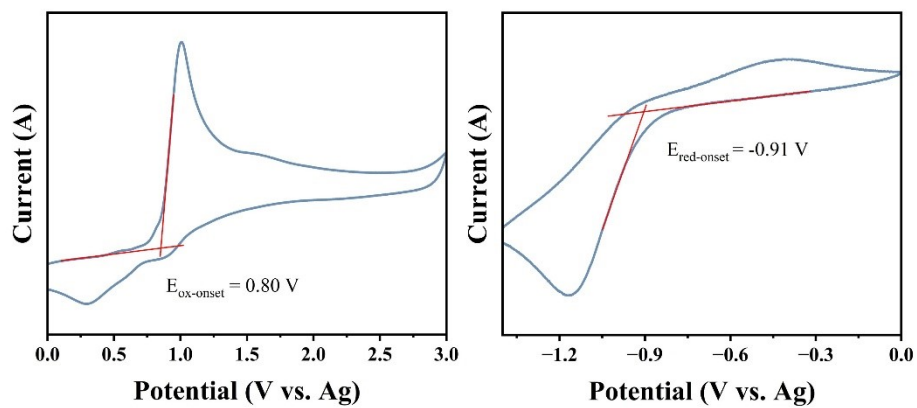

**Fig. S10** Cyclic voltammetry (CV) measurements of *N,N*-dimethyl-*p*-bromoaniline.

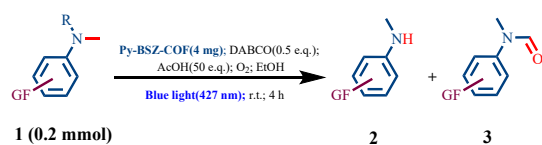

**Conversion:reactants (Yield:N-demethylation; Yield:N-formylation )**

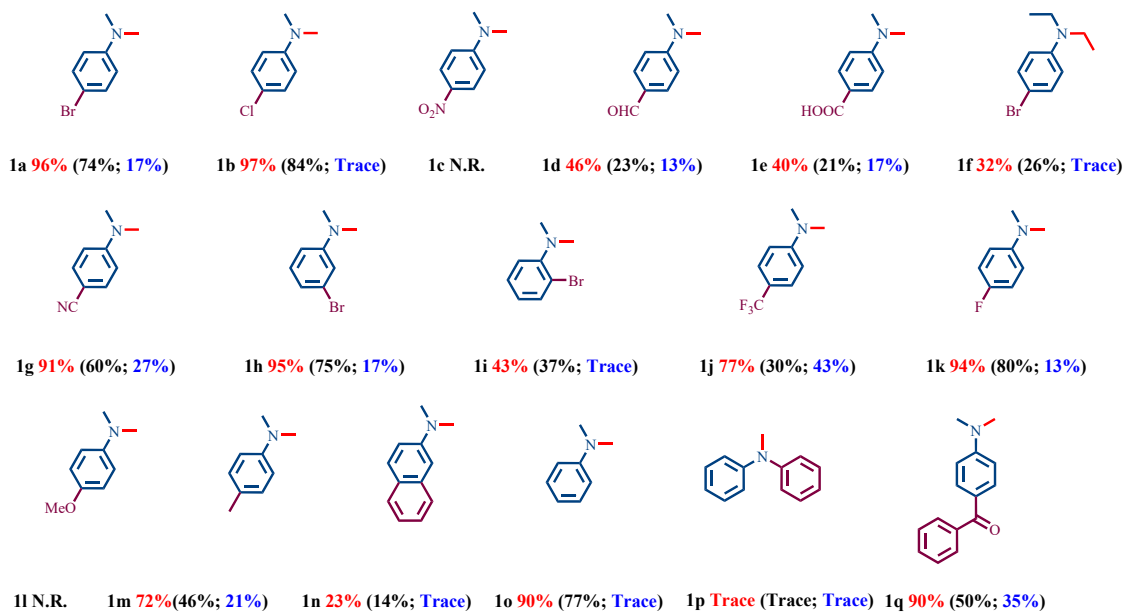

**Fig. S11** Expansion of light reaction substrates (*N*-demethylation; *N*-formylation).

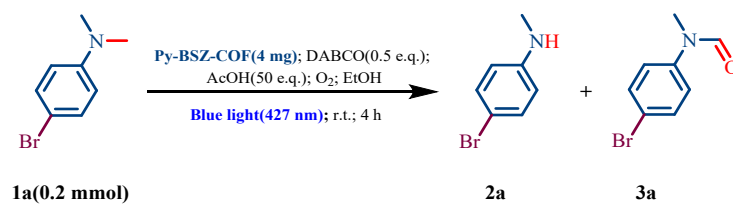

**Table S1.** Optimization of reaction conditons.

| Entry | Change from standard conditions            | 1a Conversion(%)  | 2a Yield(%) | 3a Yield(%) |
|-------|--------------------------------------------|-------------------|-------------|-------------|
| 1     | Standard conditions                        | 96                | 74          | 18          |
| 2     | No COF                                     | N.R. <sup>a</sup> | 0           | 0           |
| 3     | No light                                   | N.R. <sup>a</sup> | 0           | 0           |
| 4     | No DABCO and AcOH                          | 15                | trace       | Trace       |
| 5     | No DABCO                                   | 30                | 17          | Trace       |
| 6     | No AcOH                                    | 90                | 40          | 34          |
| 7     | 25 e.q. AcOH                               | 97                | 68          | 21          |
| 8     | 100 e.q. AcOH                              | 66                | 55          | Trace       |
| 9     | 0.25 e.q. DABCO                            | 94                | 63          | 22          |
| 10    | 1 e.q. DABCO                               | 97                | 72          | 20          |
| 11    | Air, instead of O <sub>2</sub>             | 74                | 54          | 13          |
| 12    | N <sub>2</sub> , instead of O <sub>2</sub> | Trace             | Trace       | Trace       |
| 13    | 2 mg COF                                   | 84                | 59          | 20          |
| 14    | 12 mg COF                                  | 98                | 40          | 28          |
| 15    | THF as the solvent                         | 99                | 36          | 47          |
| 16    | ACN as the solvent                         | 22                | 17          | Trace       |
| 17    | DBU as the base                            | 99                | 59          | 22          |
| 18    | KOH as the base                            | 98                | 73          | 14          |
| 19    | NaHCO <sub>3</sub> as the base             | 64                | 42          | 15          |
| 20    | 12.5 e.q. AcOH                             | 97                | 52          | 22          |
| 21    | 75 e.q. AcOH                               | 99                | 50          | 40          |
| 22    | EA as the solvent                          | 97                | 50          | 38          |

|    |                                   |    |    |       |
|----|-----------------------------------|----|----|-------|
| 23 | DMSO as the solvent               | 97 | 37 | 43    |
| 24 | 8 mg COF                          | 98 | 46 | 32    |
| 25 | 2 e.q. DABCO                      | 97 | 67 | 13    |
| 26 | Reaction time: 2 h                | 43 | 33 | Trace |
| 27 | Reaction time: 2.5 h              | 54 | 42 | Trace |
| 28 | Reaction time:3 h                 | 78 | 68 | Trace |
| 29 | Reaction time:3.5 h               | 93 | 72 | 14    |
| 30 | Reaction time:4.5 h               | 98 | 63 | 17    |
| 31 | Reaction time:5 h                 | 97 | 48 | 37    |
| 32 | Additional 2 mg MnO <sub>2</sub>  | 71 | 64 | Trace |
| 33 | Additional 20 mg MnO <sub>2</sub> | 70 | 65 | Trace |

**Standard Conditions:** Raw Material(0.2 mmol); 4 mg Py-BSZ-COF(C=C); 0.5 e.q. DABCO; 50 e.q. AcOH;

4 mL EtOH; 30 W 427 nm [Blue Light](#); O<sub>2</sub>; r.t.; 4 h; N.R.<sup>a</sup>=No reaction

## <sup>1</sup>H NMR and <sup>13</sup>C NMR spectra for products.

<sup>1</sup>H NMR (500 MHz, DMSO-d<sub>6</sub>) δ 7.30 – 6.97 (m, 2H), 6.59 – 6.30 (m, 2H), 2.58 (s, 3H).

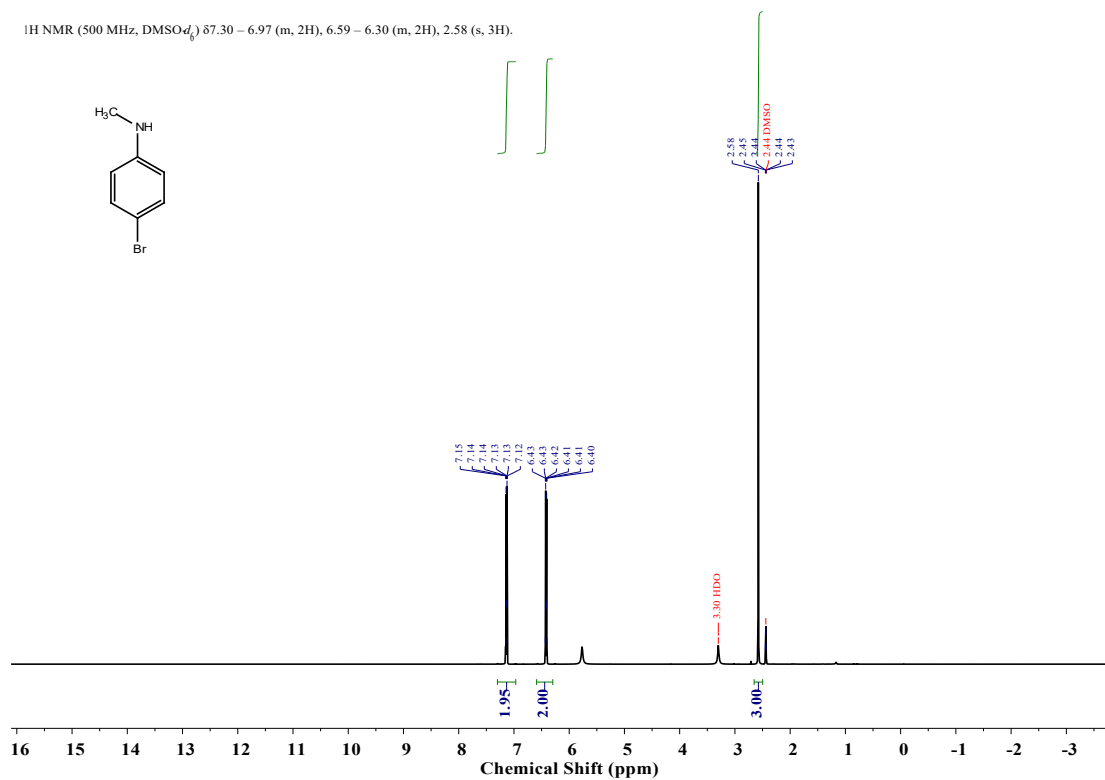

## 2a-<sup>1</sup>H NMR

<sup>13</sup>C NMR (126 MHz, DMSO-d<sub>6</sub>) δ 149.07, 131.29, 113.46, 105.98, 29.60.

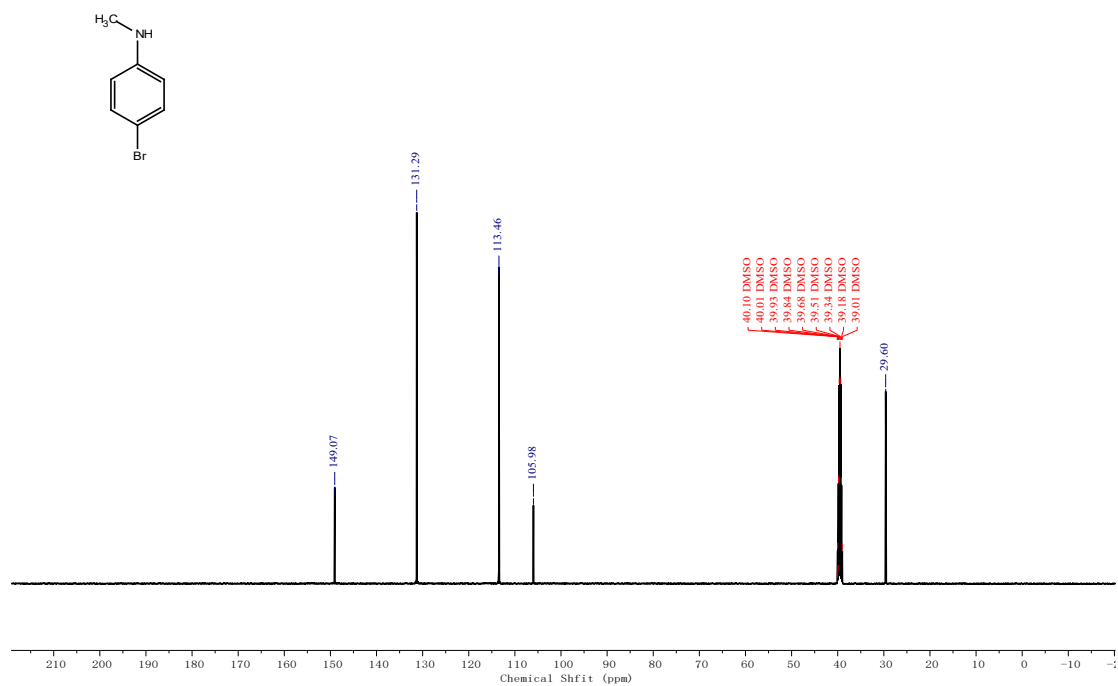

## 2a-<sup>13</sup>C NMR

<sup>1</sup>H NMR (500 MHz, DMSO-*d*<sub>6</sub>) δ 7.06 – 6.96 (m, 2H), 6.49 – 6.40 (m, 2H), 2.57 (d, *J* = 5.1 Hz, 3H).

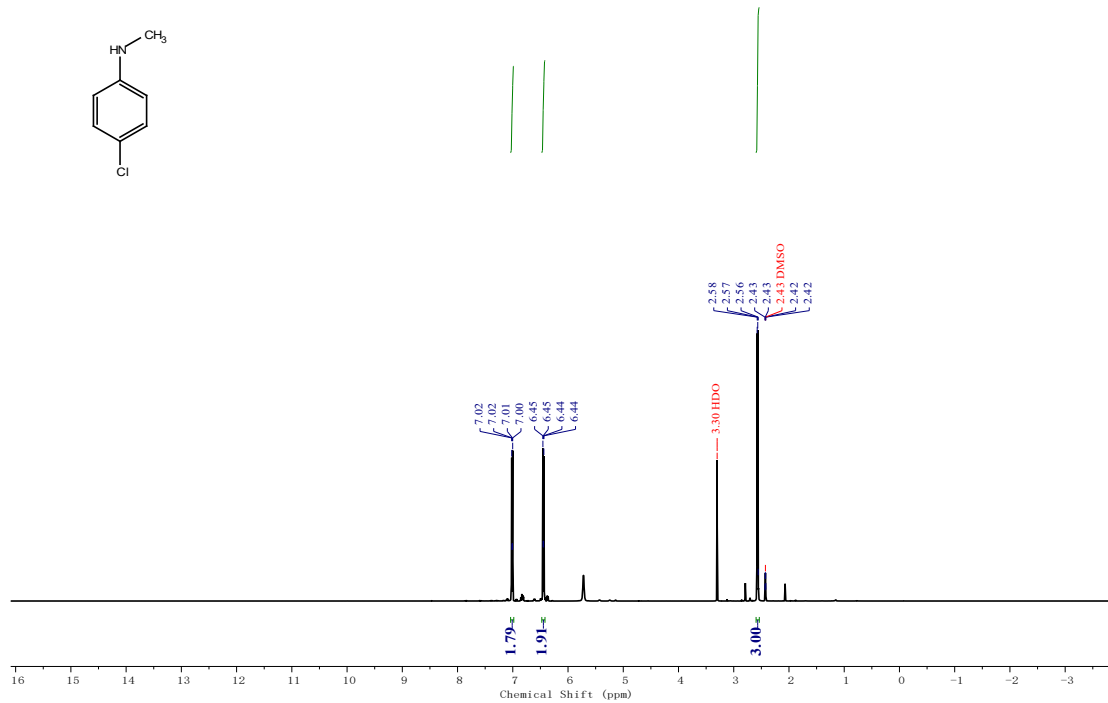

## 2b-<sup>1</sup>H NMR

$^{13}\text{C}$  NMR (126 MHz,  $\text{DMSO}-d_6$ )  $\delta$ 148.75, 128.49, 118.66, 112.86, 29.68.

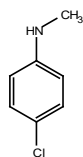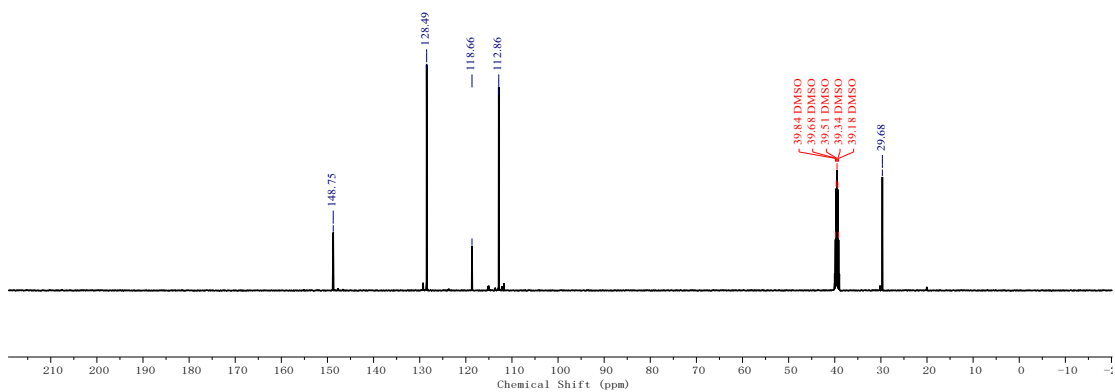

## 2b- $^{13}\text{C}$ NMR

$^1\text{H}$  NMR (500 MHz,  $\text{DMSO}-d_6$ )  $\delta$ 9.54 (s, 1H), 7.67 – 7.43 (m, 2H), 6.56 (d,  $J=8.8$  Hz, 2H), 2.70 (d,  $J=3.5$  Hz, 3H).

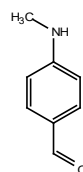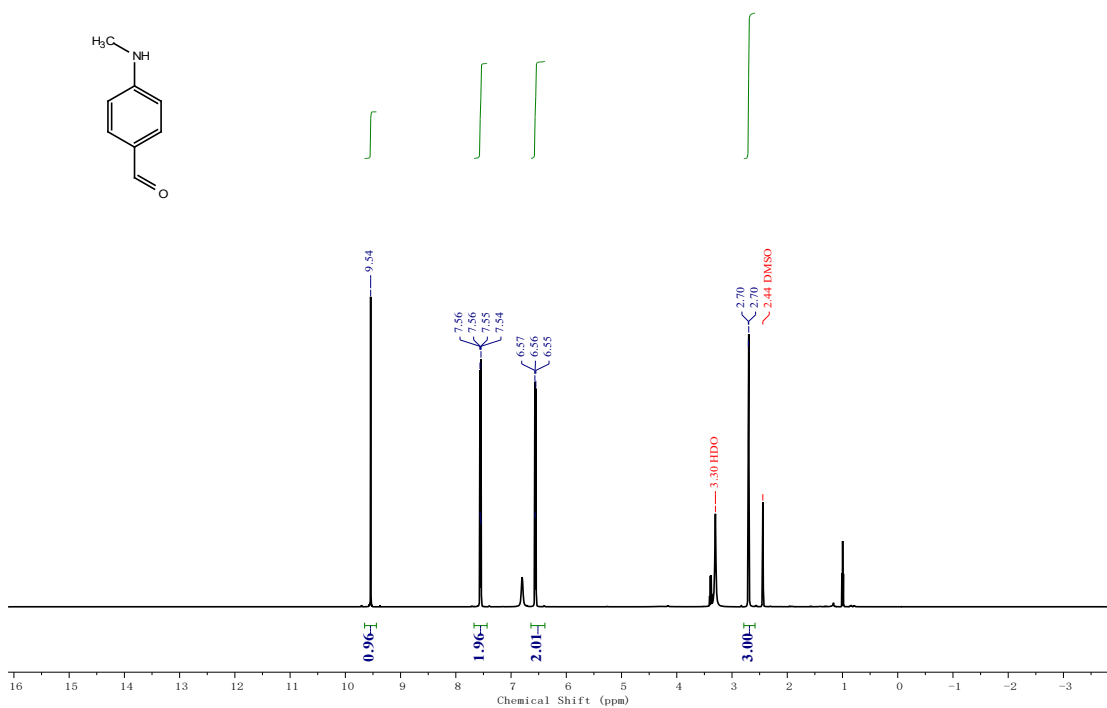

## 2d- $^1\text{H}$ NMR

$^{13}\text{C}$  NMR (126 MHz,  $\text{DMSO-}d_6$ )  $\delta$  189.55, 154.93, 124.72, 29.09.

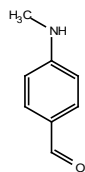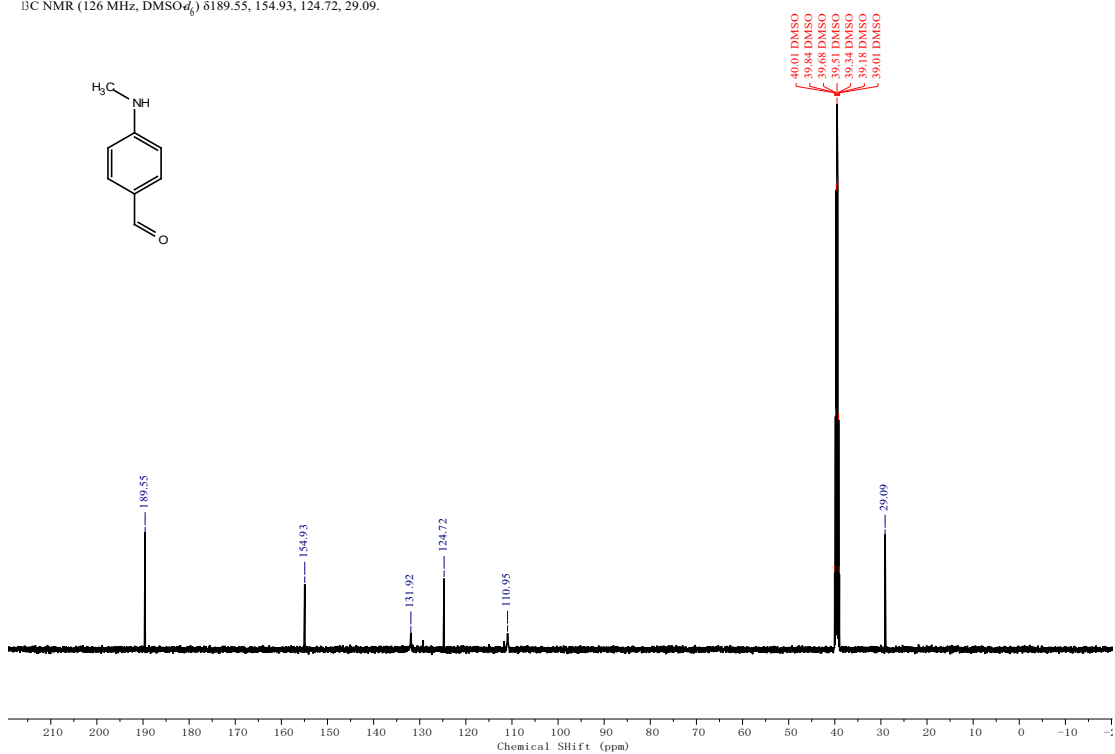

**2d**- $^{13}\text{C}$  NMR

$^1\text{H NMR}$  (500 MHz, Chloroform- $d$ )  $\delta$  7.94 (d,  $J$  = 8.8 Hz, 2H), 6.57 (d,  $J$  = 8.8 Hz, 2H), 2.91 (s, 3H).

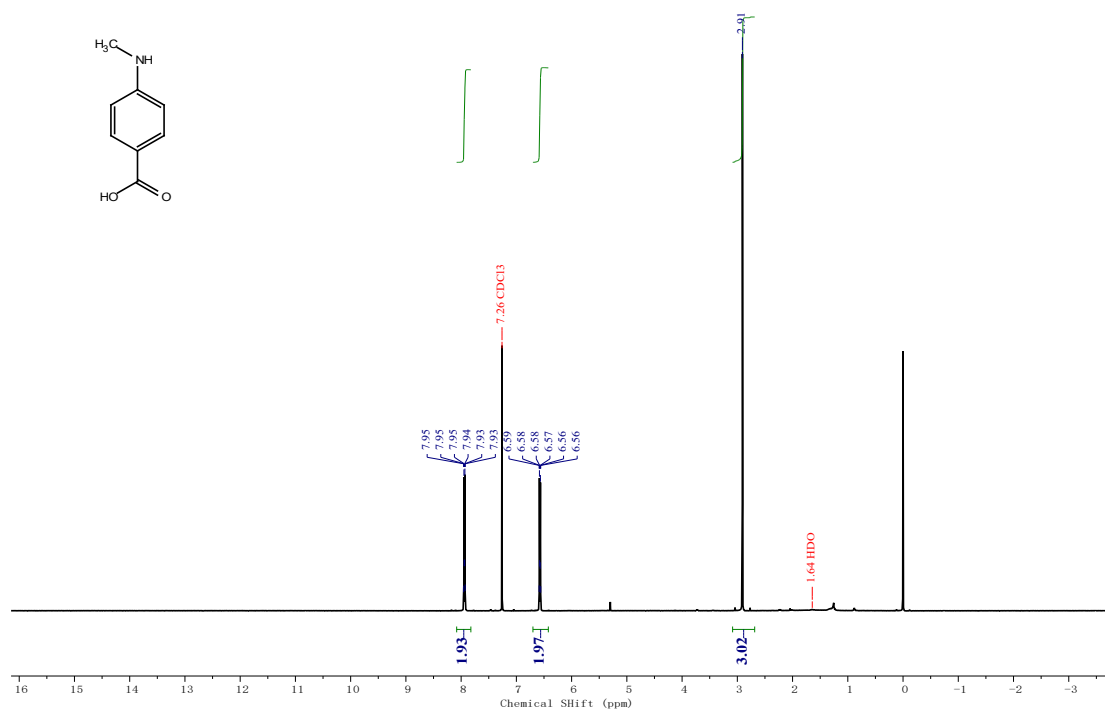

## $2e$ - $^1\text{H NMR}$

$^{13}\text{C NMR}$  (126 MHz, Chloroform- $d$ )  $\delta$  171.89, 153.66, 132.51, 117.36, 111.33, 30.34.

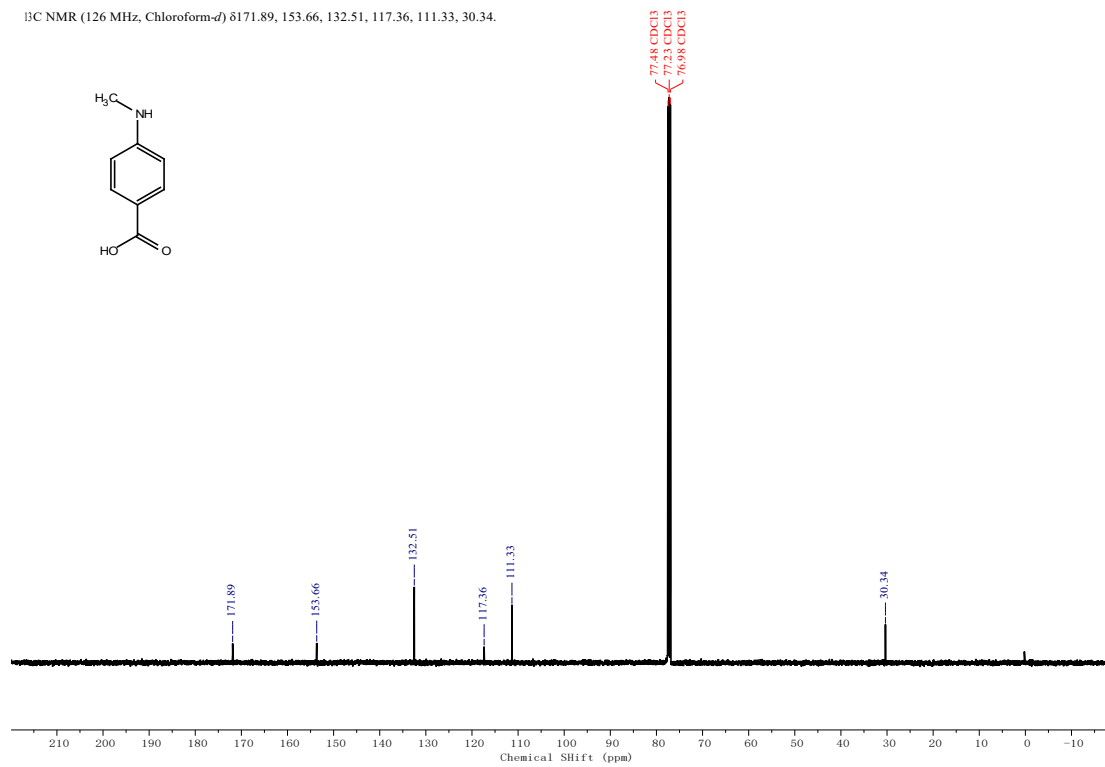

## $2e$ - $^{13}\text{C NMR}$

<sup>1</sup>H NMR (500 MHz, DMSO-*d*<sub>6</sub>) δ 7.13 (d, *J* = 8.8 Hz, 2H), 6.45 (d, *J* = 8.9 Hz, 2H), 2.94 (d, *J* = 7.1 Hz, 2H), 1.09 (t, *J* = 7.1 Hz, 3H).

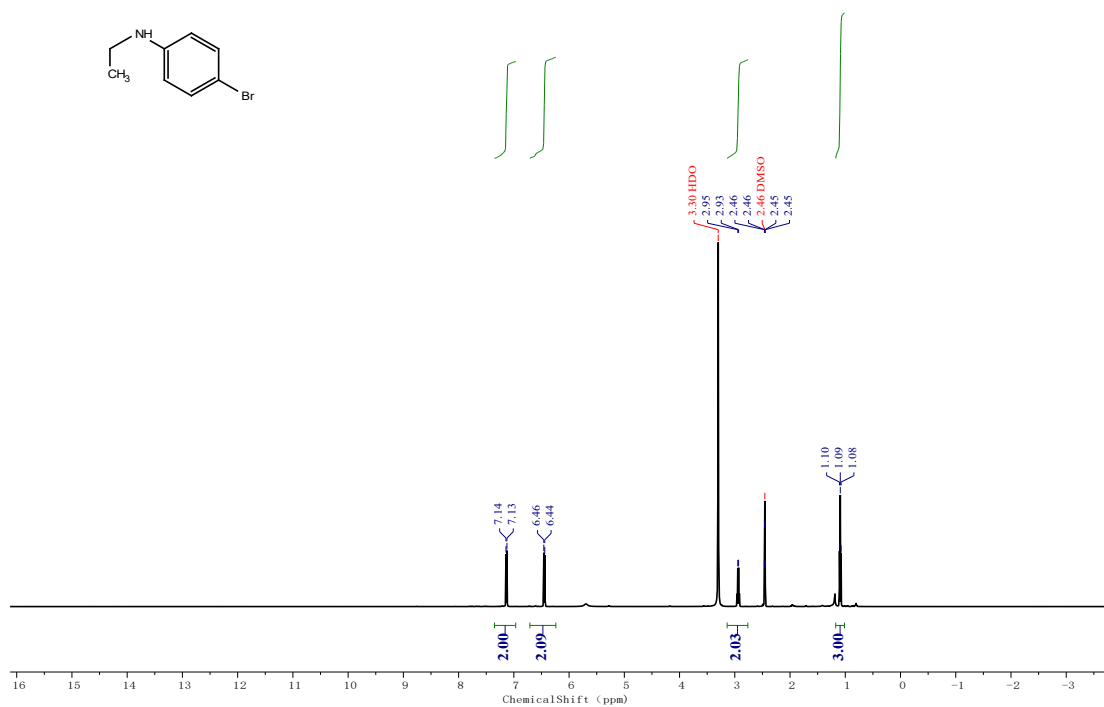

## 2f-<sup>1</sup>H NMR

<sup>13</sup>C NMR (126 MHz, DMSO-*d*<sub>6</sub>) δ 148.16, 131.33, 113.81, 105.93, 37.28, 14.19.

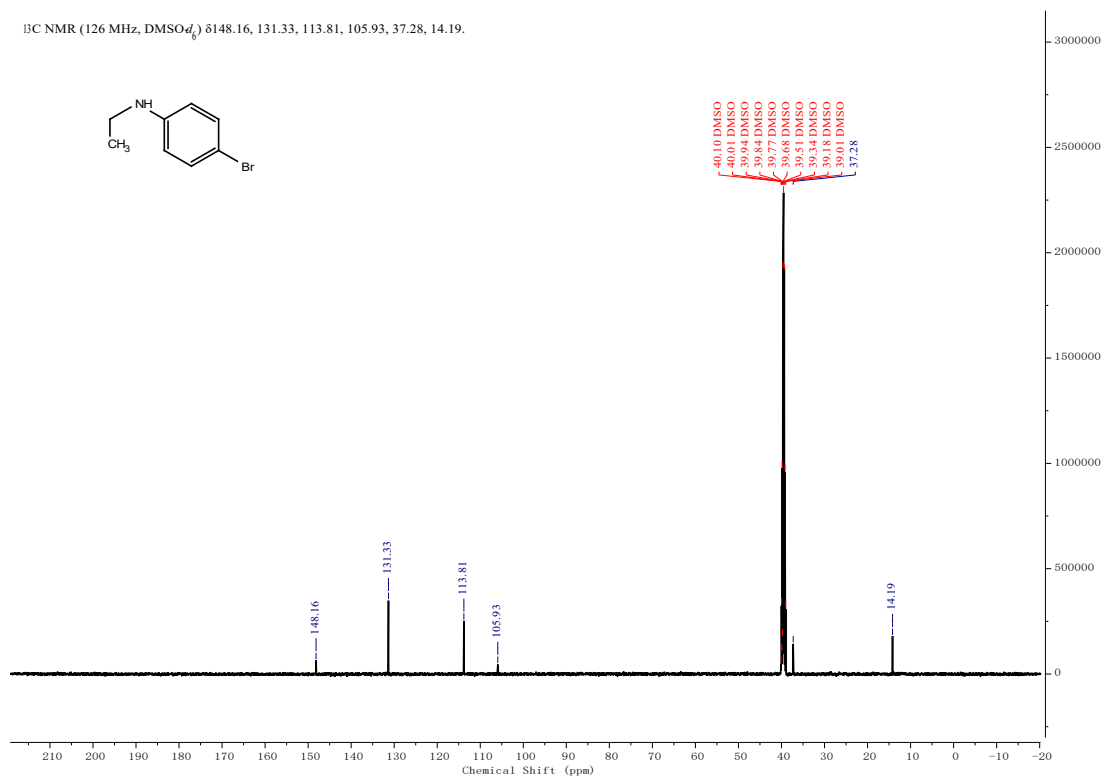

## 2f-<sup>13</sup>C NMR

<sup>1</sup>H NMR (500 MHz, DMSO-*d*<sub>6</sub>) δ 7.52 – 7.28 (m, 2H), 6.54 – 6.40 (m, 2H), 2.62 (s, 3H).

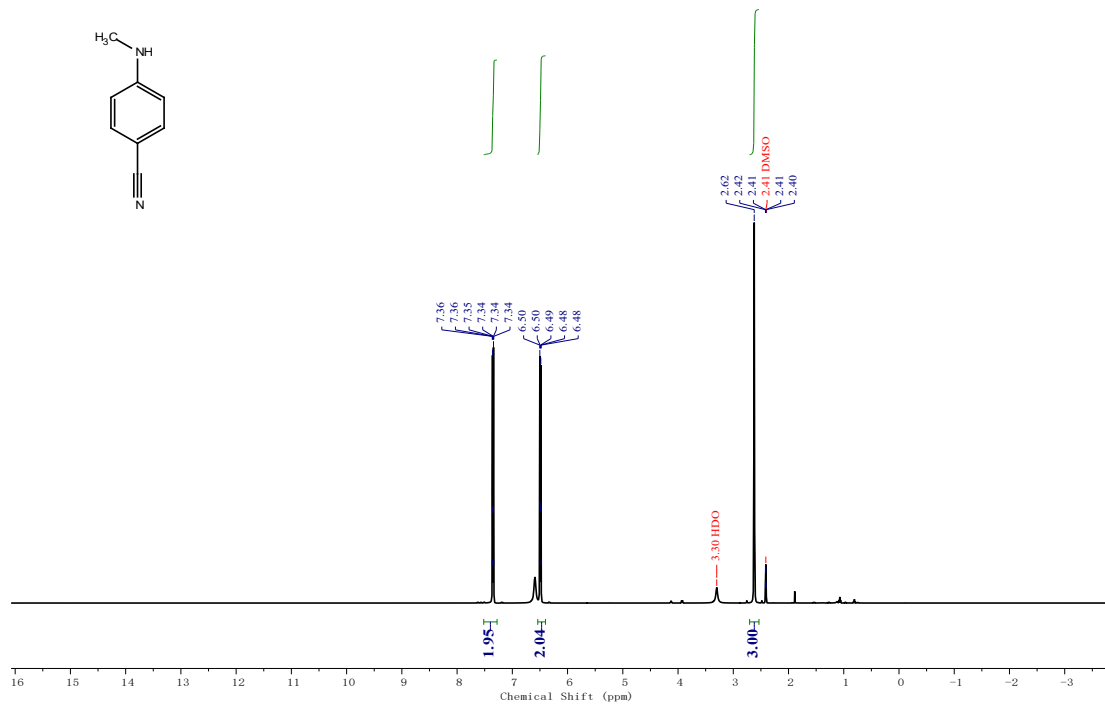

## 2g-<sup>1</sup>H NMR

$^{13}\text{C}$  NMR (126 MHz,  $\text{DMSO-}d_6$ )  $\delta$  153.04, 133.30, 120.70, 95.43, 28.97.

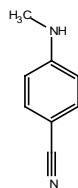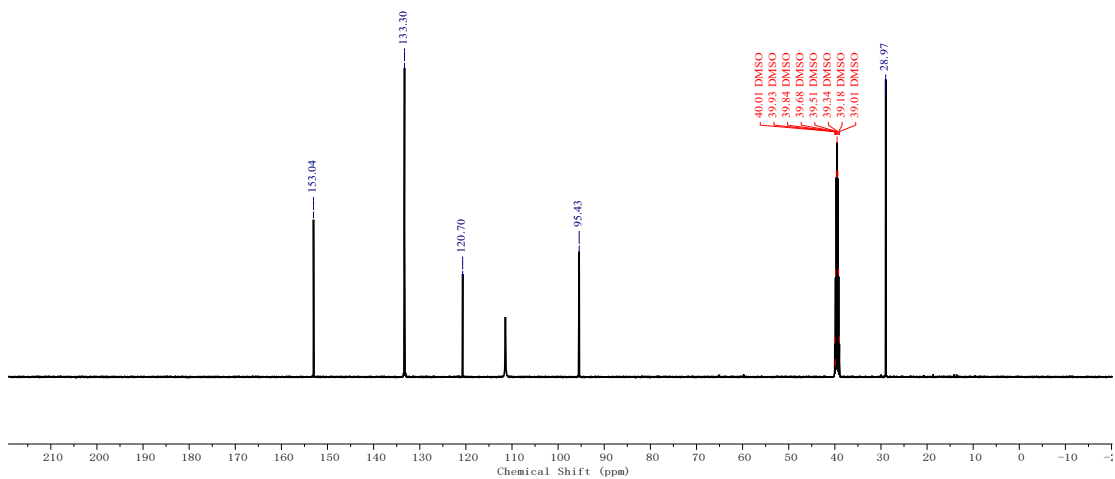

## 2g- $^{13}\text{C}$ NMR

$^1\text{H}$  NMR (500 MHz,  $\text{DMSO-}d_6$ )  $\delta$  6.92 (t,  $J = 7.9$  Hz, 1H), 6.62 – 6.54 (m, 2H), 6.43 (ddd,  $J = 8.2, 2.3, 1.0$  Hz, 1H), 2.57 (s, 3H).

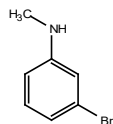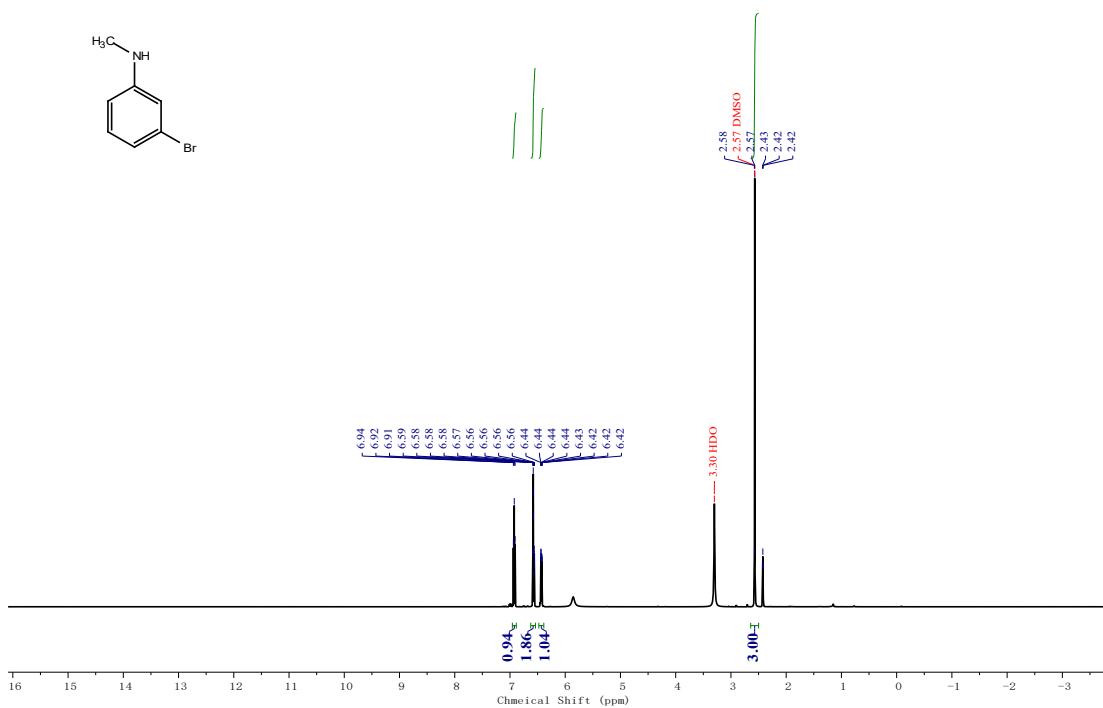

## 2h- $^1\text{H}$ NMR

$^{13}\text{C}$  NMR (126 MHz,  $\text{DMSO-}d_6$ )  $\delta$  151.49, 130.62, 122.41, 117.62, 113.48, 110.70, 29.46.

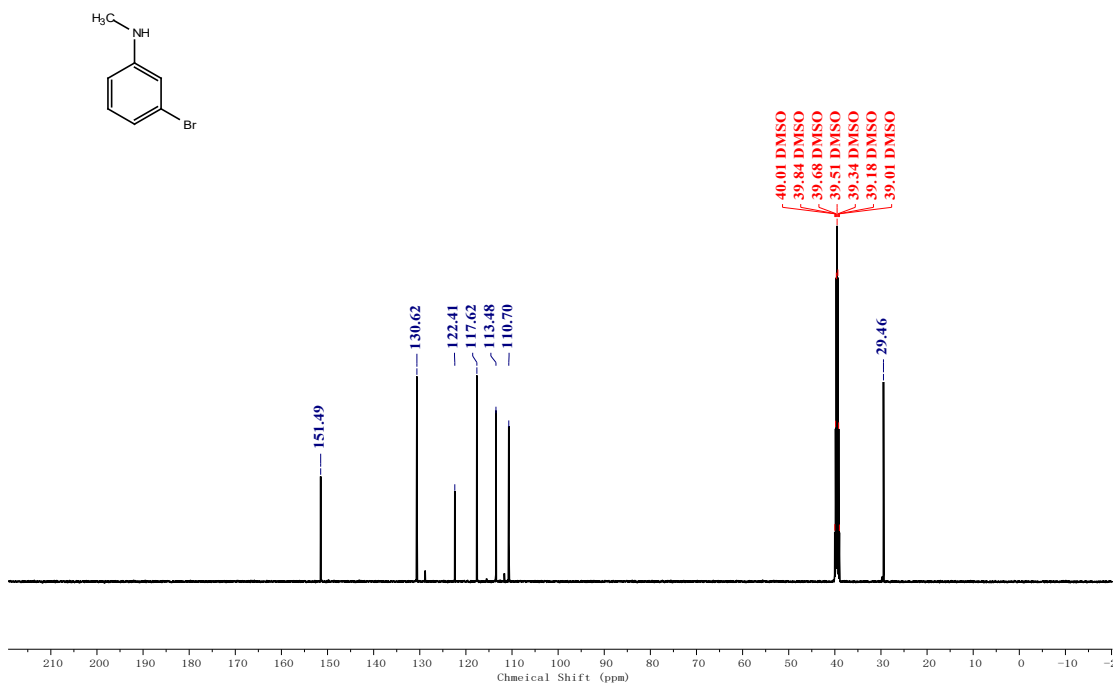

## 2h- $^{13}\text{C}$ NMR

$^1\text{H}$  NMR (500 MHz,  $\text{DMSO-}d_6$ )  $\delta$  7.32 (dd,  $J = 7.9, 1.5$  Hz, 1H), 7.12 (ddd,  $J = 8.4, 7.3, 1.5$  Hz, 1H), 6.53 (dd,  $J = 8.2, 1.5$  Hz, 1H), 6.44 (td,  $J = 7.5, 1.5$  Hz, 1H), 5.21 (d,  $J = 5.4$  Hz, 1H), 2.68 (d,  $J = 4.8$  Hz, 3H).

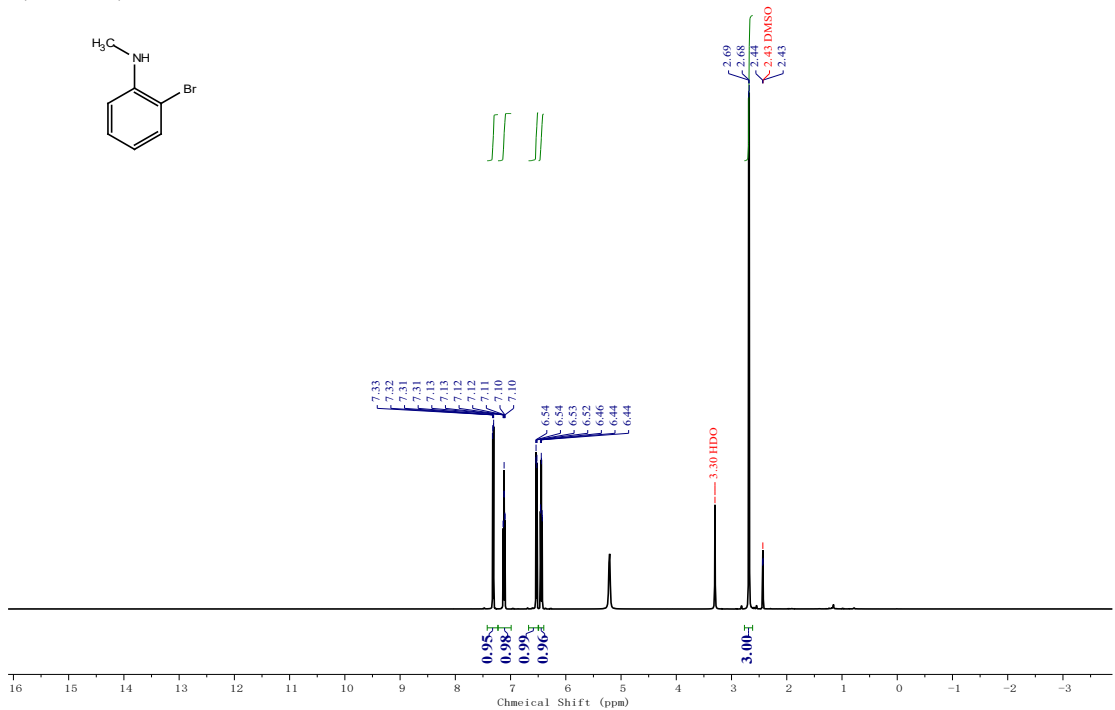

## 2i-<sup>1</sup>H NMR

<sup>13</sup>C NMR (126 MHz, DMSO-d<sub>6</sub>) δ 146.11, 131.98, 128.62, 116.70, 110.70, 108.25, 30.02.

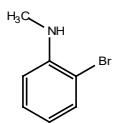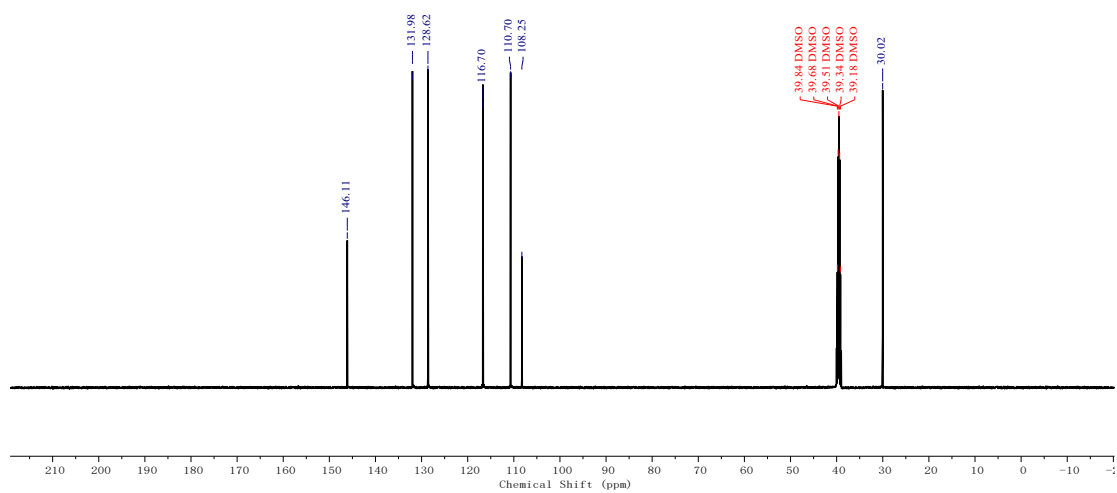

## 2i-<sup>13</sup>C NMR

$^1\text{H}$  NMR (500 MHz,  $\text{DMSO}-d_6$ )  $\delta$  7.32 (d,  $J=8.5$  Hz, 2H), 6.57 (d,  $J=8.5$  Hz, 2H), 2.66 (s, 3H).

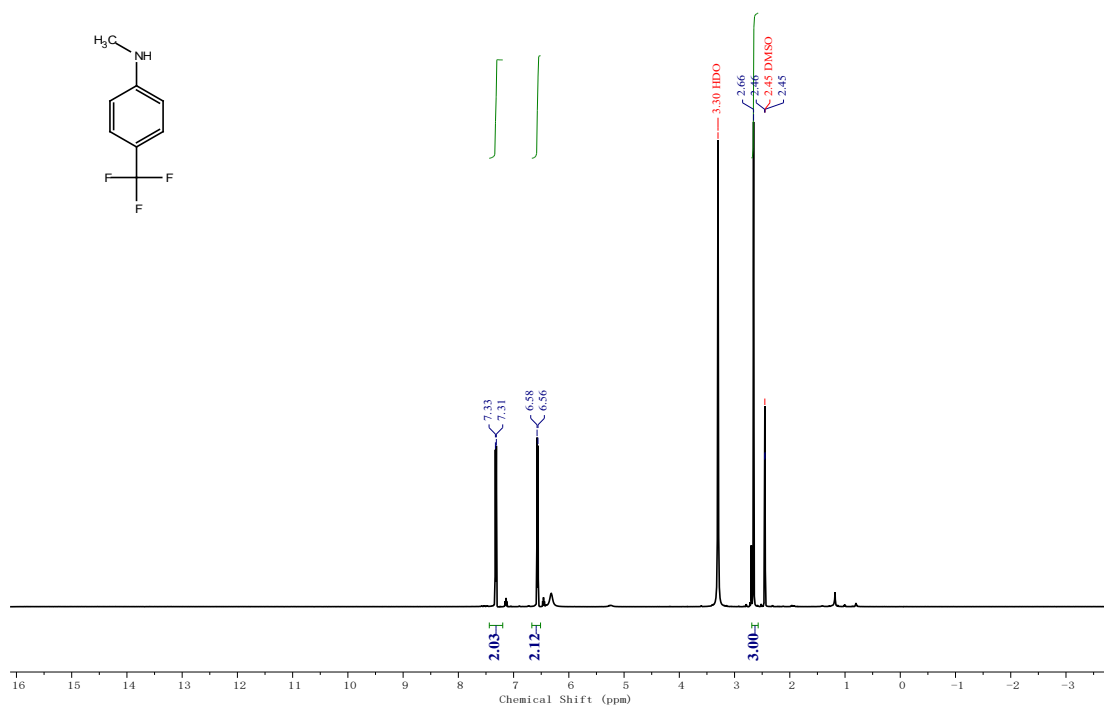

## 2j- $^1\text{H}$ NMR

$^{13}\text{C}$  NMR (126 MHz,  $\text{DMSO}-d_6$ )  $\delta$  152.65, 133.01 – 123.63 (m), 126.17 (q,  $J=3.8$  Hz), 114.92 (d,  $J=31.8$  Hz), 110.88, 29.21.

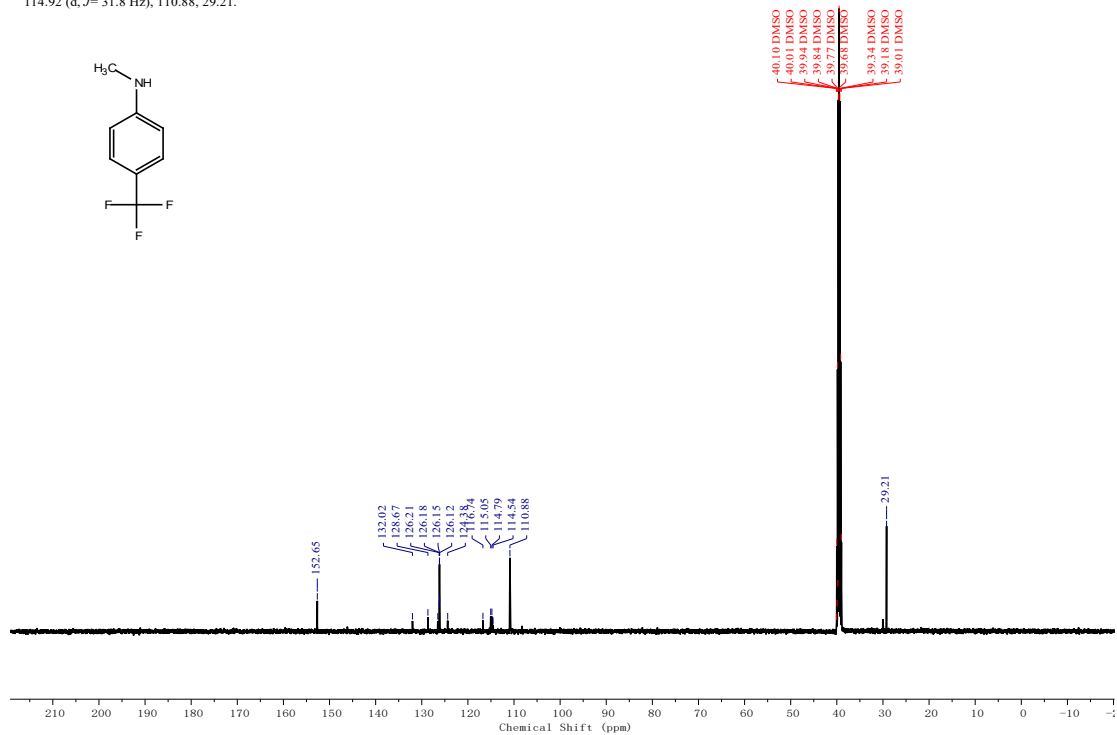

## 2j- $^{13}\text{C}$ NMR

$^1\text{H NMR}$  (500 MHz,  $\text{DMSO}-d_6$ )  $\delta$  6.92 – 6.77 (m, 2H), 6.53 – 6.32 (m, 2H), 5.44 (q,  $J = 5.2$  Hz, 1H), 2.56 (d,  $J = 5.1$  Hz, 3H).

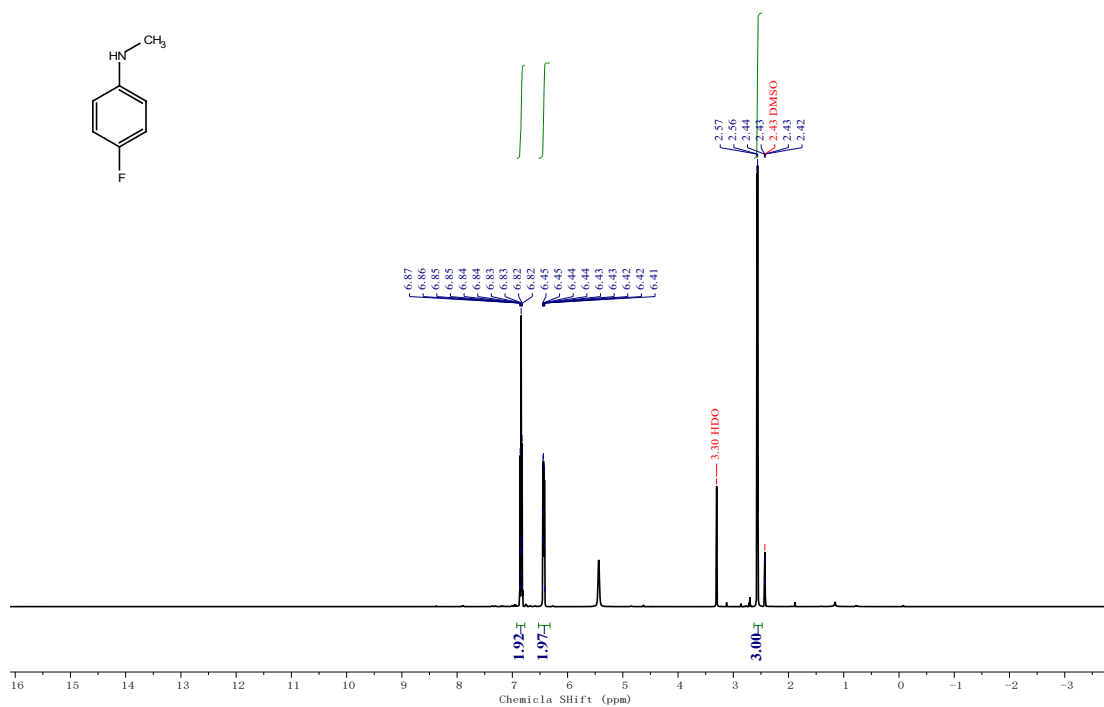

## 2k- $^1\text{H NMR}$

$^{13}\text{C NMR}$  (126 MHz,  $\text{DMSO}-d_6$ )  $\delta$  154.15 (d,  $J = 230.3$  Hz), 146.65, 115.16 (d,  $J = 22.0$  Hz), 112.19 (d,  $J = 7.3$  Hz), 30.19.

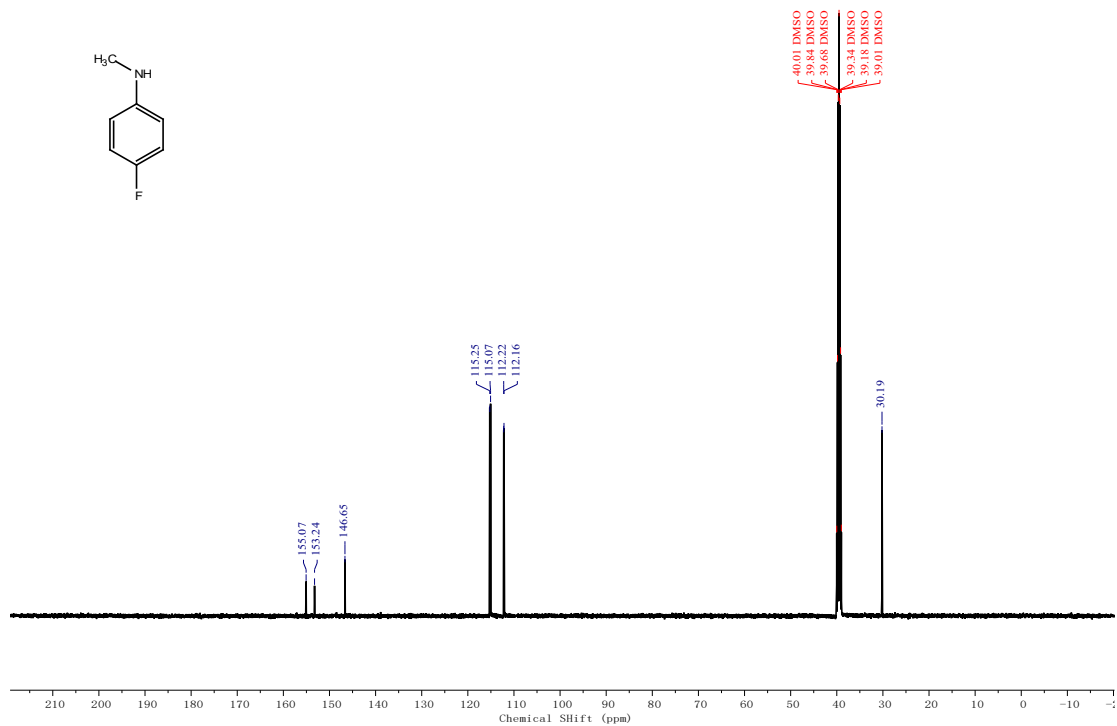

## 2k- $^{13}\text{C NMR}$





$^1\text{H NMR}$  (500 MHz,  $\text{DMSO-d}_6$ )  $\delta$  7.54 (d,  $J = 8.1$  Hz, 1H), 7.50 (s, 1H), 7.48 (s, 1H), 7.20 (ddd,  $J = 8.2, 6.7, 1.3$  Hz, 1H), 7.00 (ddd,  $J = 8.1, 6.7, 1.1$  Hz, 1H), 6.86 (dd,  $J = 8.8, 2.3$  Hz, 1H), 6.56 (d,  $J = 2.2$  Hz, 1H), 2.68 (s, 3H).

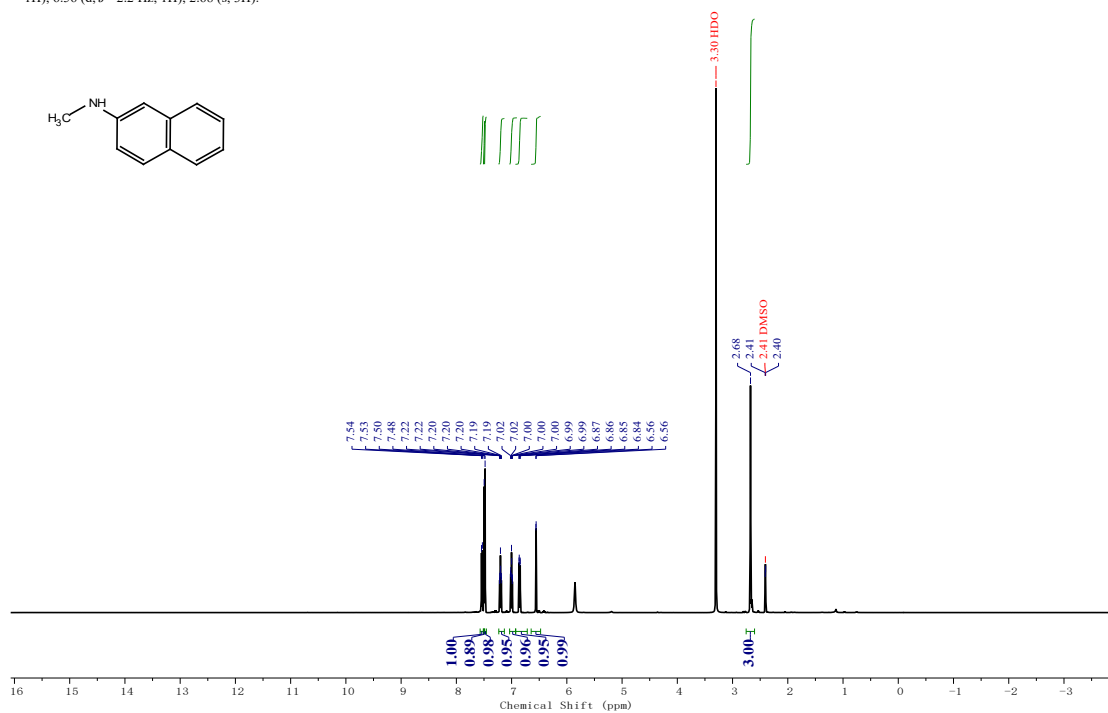

## 2n- $^1\text{H NMR}$

$^{13}\text{C NMR}$  (126 MHz,  $\text{DMSO-d}_6$ )  $\delta$  148.20, 135.72, 128.68, 127.89, 126.84, 126.43, 125.85, 121.34, 118.66, 102.12, 30.18.

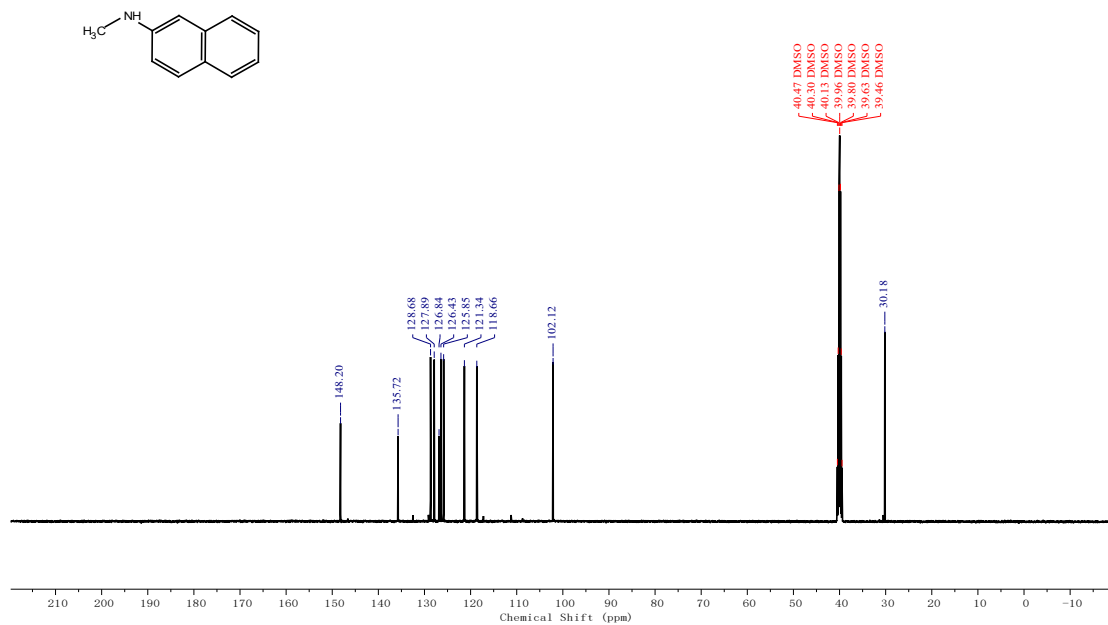

## 2n- $^{13}\text{C NMR}$

$^1\text{H NMR}$  (500 MHz,  $\text{DMSO}-d_6$ )  $\delta$  7.04 (dd,  $J = 8.4, 7.3$  Hz, 2H), 6.58 – 6.36 (m, 3H), 2.62 (s, 3H).

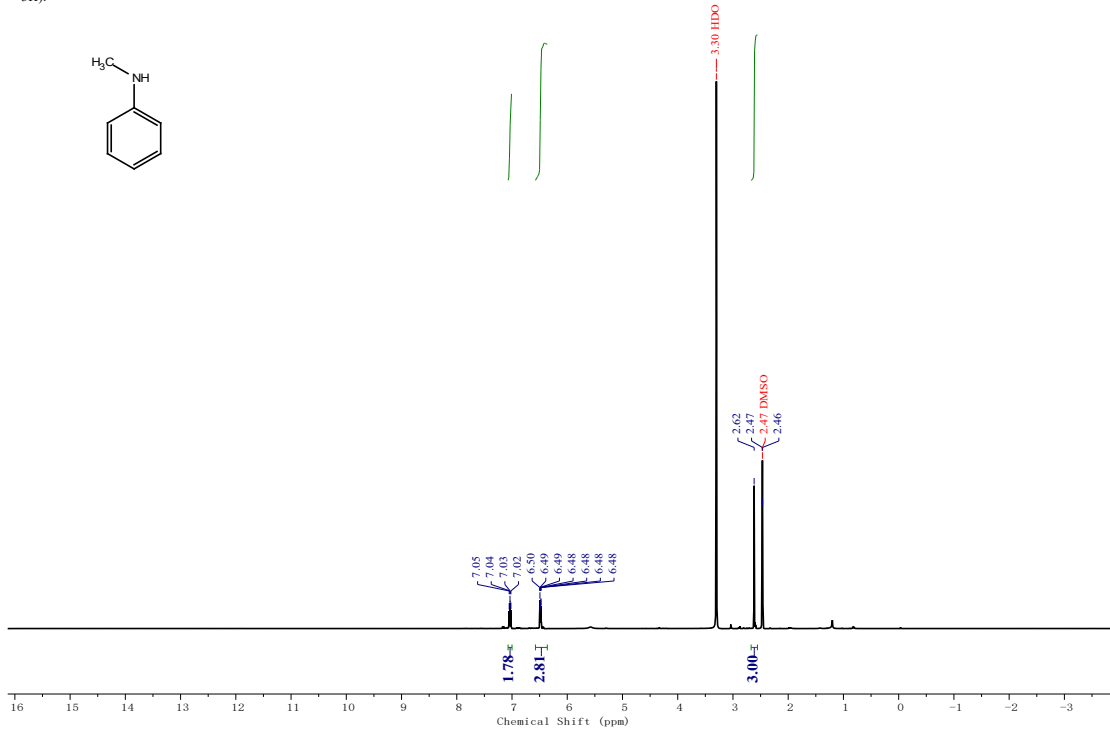

## $^{13}\text{C NMR}$

$^{13}\text{C NMR}$  (126 MHz,  $\text{DMSO}-d_6$ )  $\delta$  149.80, 128.81, 115.47, 111.63, 29.72.

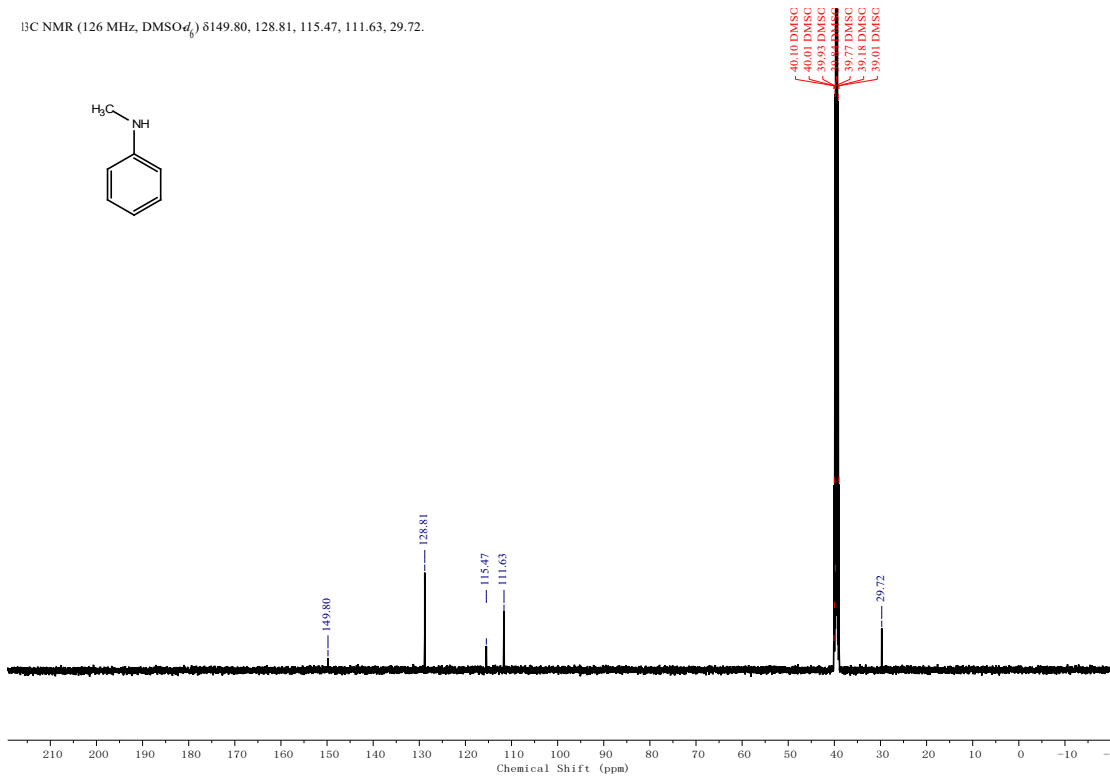

## $^{13}\text{C NMR}$

<sup>1</sup>H NMR (500 MHz, DMSO-d<sub>6</sub>) δ7.60 – 7.50 (m, 5H), 7.46 (dd, *J*= 8.1, 6.8 Hz, 2H), 6.55 (d, *J* = 8.8 Hz, 2H), 2.71 (d, *J*= 2.2 Hz, 3H).

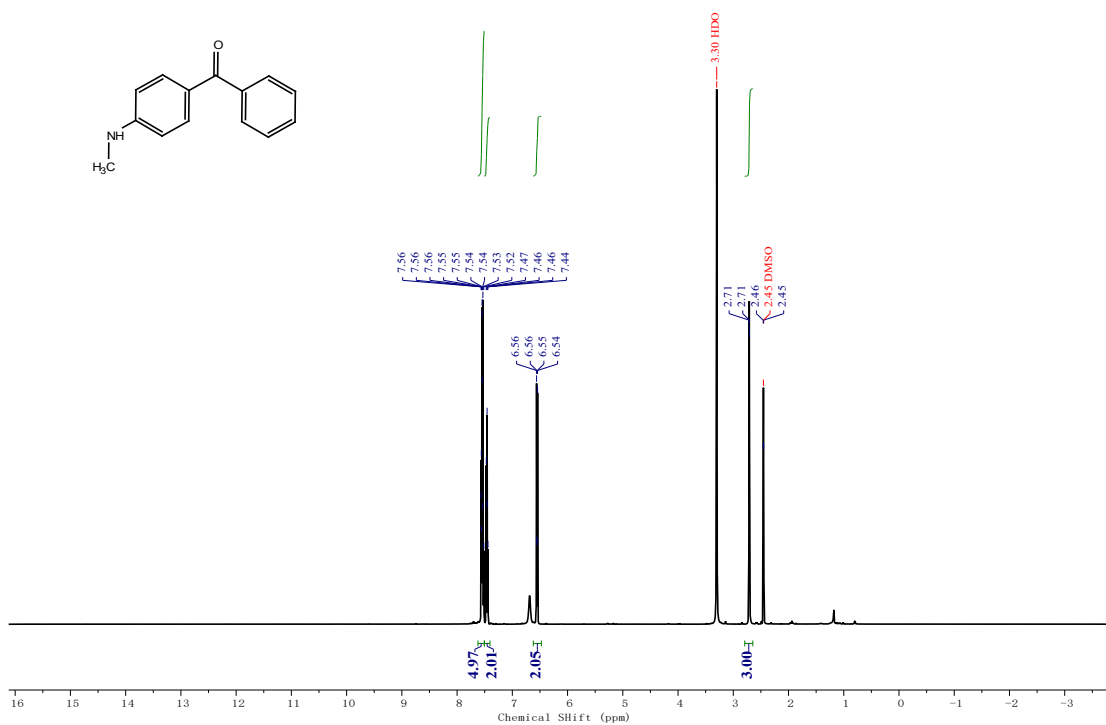

## 2q-<sup>1</sup>H NMR

<sup>13</sup>C NMR (126 MHz, DMSO-d<sub>6</sub>) δ193.43, 153.83, 139.07, 132.43, 131.04, 128.77, 128.18, 123.57, 110.52, 29.14.

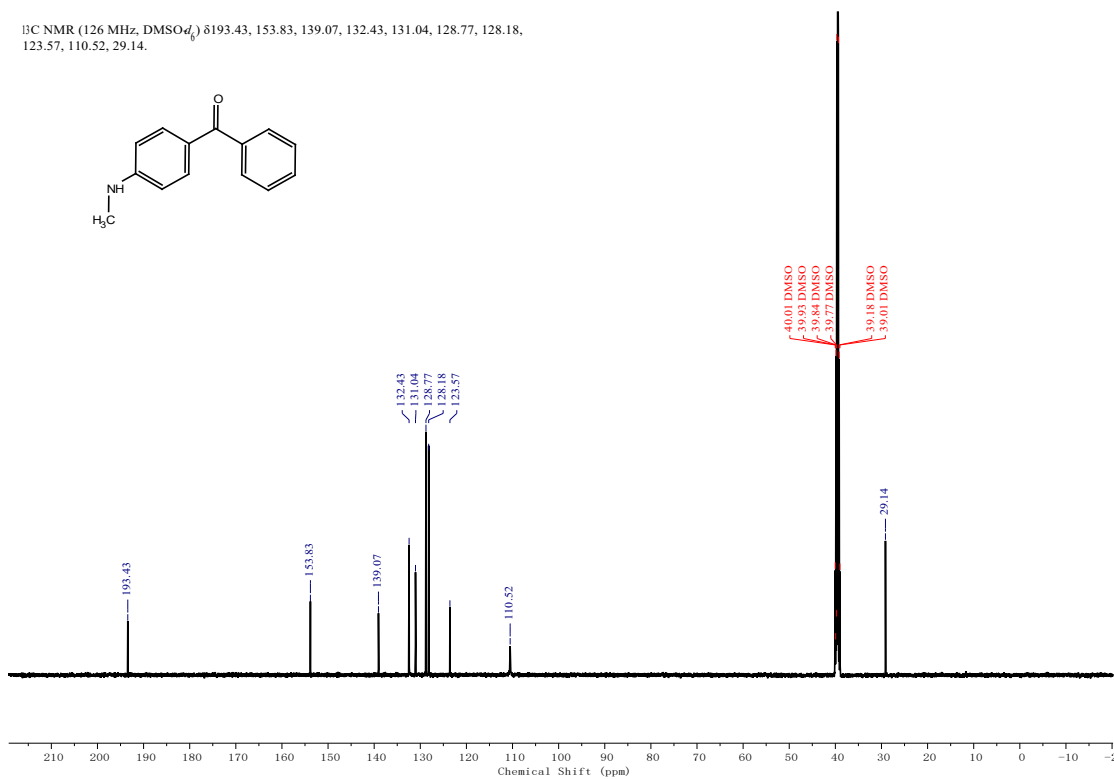

## 2q-<sup>13</sup>C NMR
